# Supplementary material
Source: MDPI journal article supplement (https://www.mdpi.com/2071-1050/15/6/4931)
Supplement: s1 [file s1]

# If Sand Interlayer Acts Better than Straw Interlayer for Saline Soil Amelioration? A Three-Year Field Experiment

Na Liu <sup>†</sup>, Wenhao Feng <sup>†</sup>, Hongyuan Zhang, Fangdi Chang, Jing Wang, Yuyi Li, Huancheng Pang <sup>\*</sup>

Institute of Agricultural Resources and Regional Planning, Chinese Academy of Agricultural Sciences, No. 12 Zhongguancun South Street, Haidian District, Beijing 100081, China

<sup>\*</sup> Correspondence: panghuancheng@caas.cn; Tel.: +86-137-0123-1396

<sup>†</sup> These authors contributed equally to this work.

**Table S1.** Analysis of variance for soil desalinization ( $S_{DR}$ ) and back salting ratio ( $S_{RR}$ ), stratification ratio of salt content before irrigation ( $SR^a$ ), after irrigation ( $SR^b$ ) and after harvesting ( $SR^c$ ), Leaching flux (FL) and evaporation flux (FE) of salt, as well as emergence rate and seeds yields under no interlayer, straw interlayer, and sand interlayer treatments from 2018 to 2020.

| Index          | Source of variation |           |                         |
|----------------|---------------------|-----------|-------------------------|
|                | Year                | Treatment | Year $\times$ Treatment |
| $S_{DR}$       | **                  | ns        | **                      |
| $S_{RR}$       | ns                  | ns        | ns                      |
| $SR^a$         | **                  | ***       | ***                     |
| $SR^b$         | ***                 | ***       | ns                      |
| $SR^c$         | ns                  | ***       | ns                      |
| FL             | ***                 | ns        | ***                     |
| FE             | *                   | ns        | ns                      |
| Emergence rate | ns                  | **        | ns                      |
| Seed yields    | ***                 | ***       | ns                      |

Note: \* $p < 0.05$ , \*\* $p < 0.01$ , \*\*\* $p < 0.001$ , and ns not significant difference.
